# Supplementary material
Source: PubMed Central journal article supplement (PMC5423205)
Supplement: MOL2-10-1296-s001.pdf [file MOL2-10-1296-s001.pdf]

# Figure S1

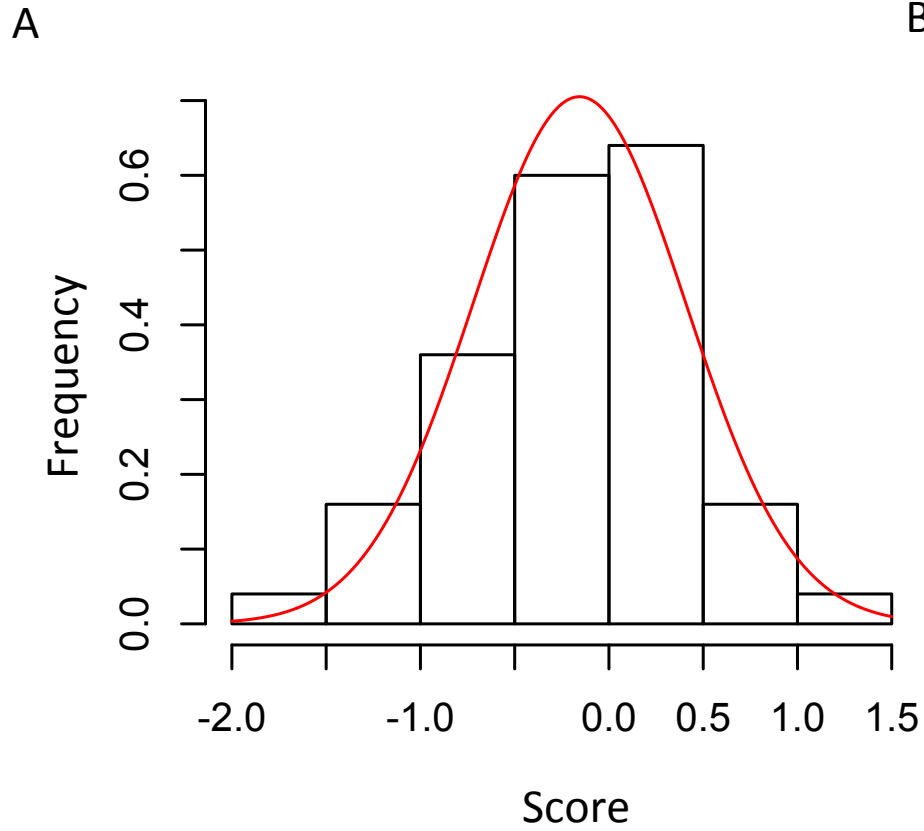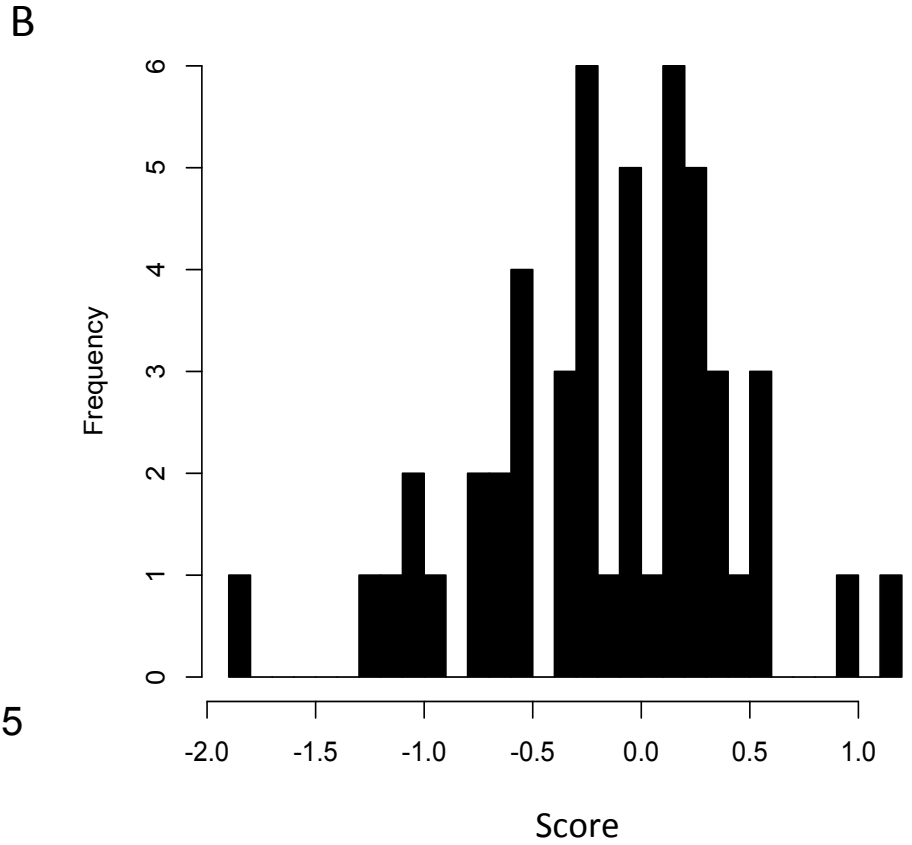

# Table S1

| <b>Characteristic</b>                                     | <b>Number of patients<br/>(n=473)</b> |
|-----------------------------------------------------------|---------------------------------------|
| <b>Age (median=60)</b>                                    |                                       |
| <60 years                                                 | 224                                   |
| ≥60 years                                                 | 249                                   |
| <b>Gender</b>                                             |                                       |
| Male                                                      | 290                                   |
| Female                                                    | 183                                   |
| <b>Karnovsky Performance score</b>                        |                                       |
| ≤70                                                       | 207                                   |
| >70                                                       | 150                                   |
| Not available                                             | 116                                   |
| <b>Days to death/ last follow-up (median=9.73 months)</b> |                                       |
| <450 days                                                 | 331                                   |
| ≥450 days                                                 | 142                                   |
| <30 days                                                  | 26                                    |

# Table S2

| Minimum value on graph | Risk score at minimum | Hazard ratio of log-rank | 95% confidence intervals | p value  |
|------------------------|-----------------------|--------------------------|--------------------------|----------|
| 1                      | -1.54                 | NA                       |                          |          |
| 2                      | -0.87                 | 0.1                      | CI=0.01-0.77             | 0.027    |
| 3                      | -0.46                 | 0.15                     | CI=0.05-0.45             | 7.40E-04 |
| 4                      | 0.00                  | 0.16                     | CI=0.07-0.36             | 1.20E-05 |
| 5                      | 0.79                  | 0.09                     | CI=0.01-0.95             | 0.046    |

# Table S3

## *Multivariate cox regression for training set*

|                 | <b>Number of subjects</b> | <b>HR</b> | <b>95% CI</b> | <b>p-value</b> |
|-----------------|---------------------------|-----------|---------------|----------------|
| miR profile     | 50                        | 0.118     | 0.04-0.32     | 2.40E-05       |
| No information  | 8                         | 0.95      | 0.06-15.41    | 9.70E-01       |
| Adjuvant tmt    | 8                         | 1.016     | 0.11-9.11     | 9.90E-01       |
| Progression tmt | 29                        | 1.956     | 0.25-15.60    | 5.30E-01       |
| Recurrence tmt  | 5                         | 1.019     | 0.08-12.43    | 9.90E-01       |

## *Multivariate cox regression for test set*

|                 | <b>Number of subjects</b> | <b>HR</b> | <b>95% CI</b> | <b>p-value</b> |
|-----------------|---------------------------|-----------|---------------|----------------|
| miR profile     | 37                        | 4.36E-01  | 0.04-1.31     | 0.14           |
| No information  | 11                        | 1.62E-08  | 0-inf         | 1              |
| Adjuvant tmt    | 8                         | 2.20E+00  | 0.26-18.40    | 0.47           |
| Progression tmt | 16                        | 8.16E-01  | 0.09-7.23     | 0.86           |
| Recurrence tmt  | 2                         | 1.30E-08  | 0-inf         | 1              |

# Figure S2

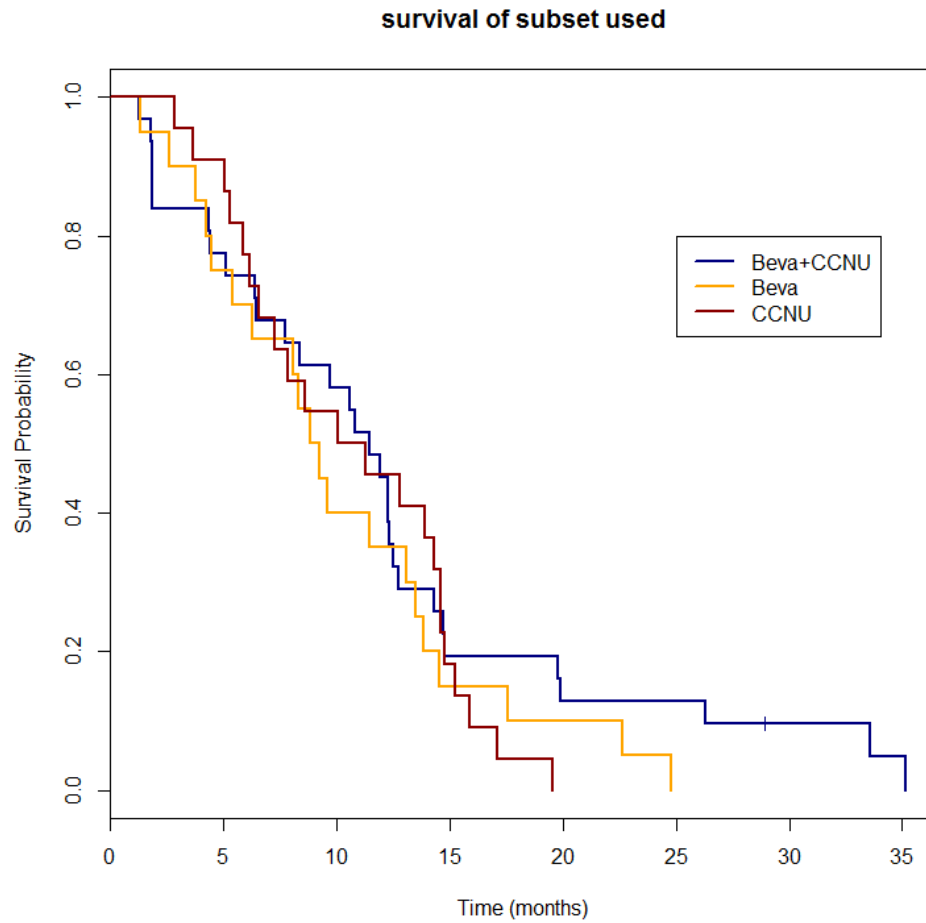

# Figure S3

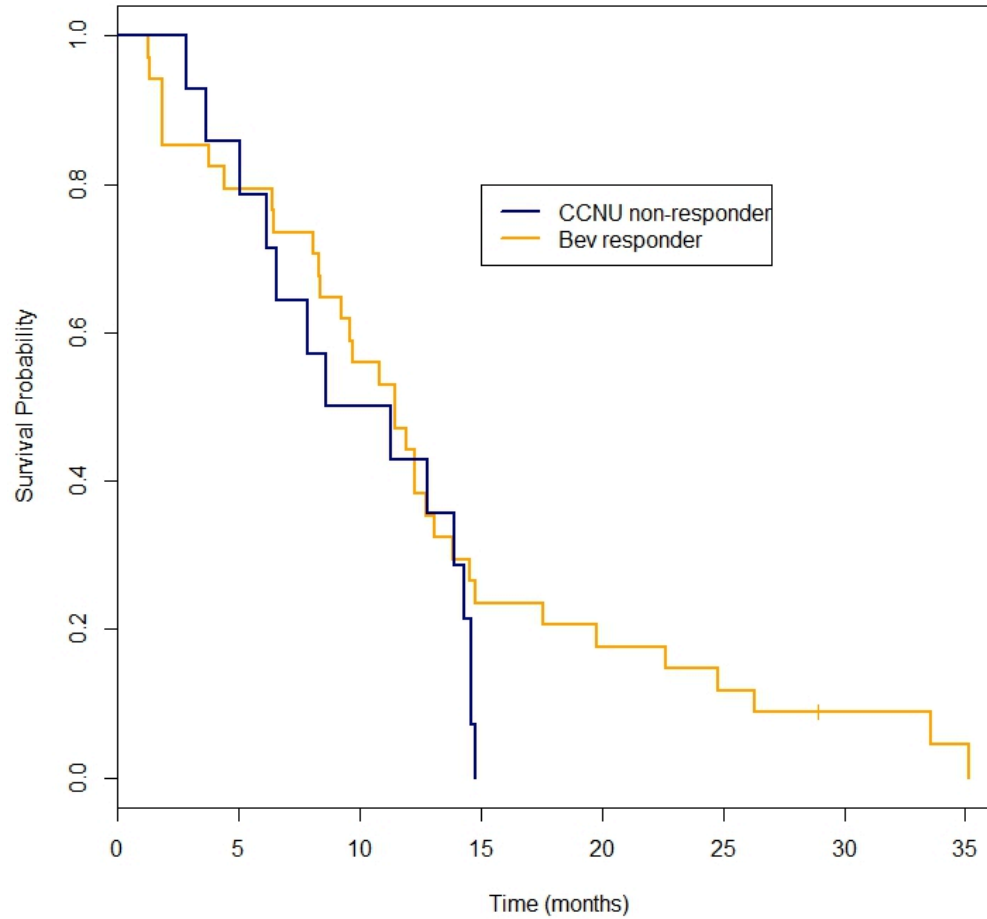

HR=1.12

95% CI 0.51- 2.49

p=0.77
